# Supplementary material
Source: MDPI journal article supplement (https://www.mdpi.com/2036-7449/14/4/56)
Supplement: s1 [file s1]

**Table S1:** Variables considered as potential risk factors of avian influenza subtype H9 outbreaks in poultry farms of central lowland Nepal.

| SN                              | Variables                                            | Category     | Cases (n=51) | Control (n=51) |
|---------------------------------|------------------------------------------------------|--------------|--------------|----------------|
| Farm and flock characteristics  |                                                      |              |              |                |
| 1                               | Median flock size                                    | >2000        | 29           | 18             |
|                                 |                                                      | ≤2000        | 22           | 33             |
| 2                               | Distance from the main road                          | ≤0.5 Km      | 22           | 12             |
|                                 |                                                      | >0.5 Km      | 29           | 39             |
| 3                               | Distance from the nearest poultry farm               | ≤1 Km        | 41           | 44             |
|                                 |                                                      | >1 Km        | 10           | 7              |
| 4                               | Distance from the nearest infected farm              | ≤1 Km        | 20           | 1              |
|                                 |                                                      | >1 Km        | 31           | 50             |
| 5                               | Age of the flock during sample submission in the lab | >28.7 weeks  | 25           | 24             |
|                                 |                                                      | ≤28.7 Weeks  | 26           | 27             |
| 6                               | History of IBD in the flock                          | Yes          | 11           | 3              |
|                                 |                                                      | No           | 40           | 48             |
| 7                               | History of <i>E. coli</i> in the flock               | Yes          | 28           | 26             |
|                                 |                                                      | No           | 23           | 25             |
| 8                               | History of H9 in the farm                            | Yes          | 25           | 0              |
|                                 |                                                      | No           | 26           | 51             |
| Farm management and biosecurity |                                                      |              |              |                |
| 9                               | Fumigation                                           | Yes          | 8            | 14             |
|                                 |                                                      | No           | 43           | 37             |
| 10                              | Water Source                                         | Tap Water    | 26           | 21             |
|                                 |                                                      | Other Source | 25           | 30             |
| 11                              | The flooring of the farm                             | Cemented     | 47           | 48             |
|                                 |                                                      | Other        | 4            | 3              |
| 12                              | Drinking water system                                | Automatic    | 32           | 27             |
|                                 |                                                      | Manual       | 19           | 24             |
| 13                              | Sharing of farm instruments or feed                  | Yes          | 9            | 3              |
|                                 |                                                      | No           | 42           | 48             |
| 14                              | Use of apron or separate cloth in the shed           | Yes          | 7            | 22             |
|                                 |                                                      | No           | 44           | 29             |
| 15                              | Use of boot or separate slippers inside the shed     | Yes          | 34           | 44             |
|                                 |                                                      | No           | 17           | 7              |
| 16                              | Footbath at the farm entrance                        | Yes          | 5            | 7              |
|                                 |                                                      | No           | 46           | 44             |
| 17                              | Visitors allow inside poultry shed                   | Yes          | 25           | 13             |
|                                 |                                                      | No           | 26           | 38             |
| 18                              |                                                      | Yes          | 16           | 22             |

|    |                                                   |     |    |    |
|----|---------------------------------------------------|-----|----|----|
|    | Spraying workers before entering poultry shed     | No  | 35 | 29 |
| 19 | Spraying visitors before entering inside the farm | Yes | 30 | 34 |
|    |                                                   | No  | 21 | 17 |
| 20 | Disinfection around the farm                      | Yes | 40 | 42 |
|    |                                                   | No  | 11 | 9  |
| 21 | Farm fully fenced                                 | Yes | 16 | 13 |
|    |                                                   | No  | 35 | 38 |
| 22 | Wild birds coming around the farm                 | Yes | 32 | 13 |
|    |                                                   | No  | 19 | 38 |
| 23 | Presence of rodents inside poultry shed           | Yes | 37 | 37 |
|    |                                                   | No  | 14 | 14 |
| 24 | Pond or water reservoir around the farm           | Yes | 17 | 14 |
|    |                                                   | No  | 37 | 43 |
| 25 | Biosecurity sign in the farm                      | Yes | 2  | 8  |
|    |                                                   | No  | 49 | 43 |
